# Supplementary material for: Factors affecting sustainable adoption of e-health technology in developing countries: an exploratory survey of Nigerian hospitals from the perspective of healthcare professionals
Source: PubMed Central journal article supplement (PMC5835346; doi:10.7717/peerj.4436), 2018-03-01
Supplement: peerj-06-4436-s001.pdf [file peerj-06-4436-s001.pdf]

## APPENDIX

### Questionnaire Items For E-health Survey

Please indicate your opinion on each of the item with a tick “√” based on scale 1-7:

1=strongly disagree, 2=disagree, 3=slightly disagree, 4=neutral, 5=slightly agree, 6=agree, 7=strongly agree.

| <b>Perceived Usefulness</b>                                                          | <b>1</b> | <b>2</b> | <b>3</b> | <b>4</b> | <b>5</b> | <b>6</b> | <b>7</b> |
|--------------------------------------------------------------------------------------|----------|----------|----------|----------|----------|----------|----------|
| Using e-health system enables me to accomplish tasks more quickly                    |          |          |          |          |          |          |          |
| Using e-health system increases my work productivity                                 |          |          |          |          |          |          |          |
| Using e-health system enhances my effectiveness on the job                           |          |          |          |          |          |          |          |
| Using e-health system makes it easier to do my work                                  |          |          |          |          |          |          |          |
| <b>Attitude towards e-health</b>                                                     |          |          |          |          |          |          |          |
|                                                                                      | <b>1</b> | <b>2</b> | <b>3</b> | <b>4</b> | <b>5</b> | <b>6</b> | <b>7</b> |
| Using e-health system gives me greater control over my work                          |          |          |          |          |          |          |          |
| Using e-health system improves my work performance                                   |          |          |          |          |          |          |          |
| Using e-health system saves me time to conduct my work                               |          |          |          |          |          |          |          |
| Using e-health system improves the quality of the work I do                          |          |          |          |          |          |          |          |
| <b>Intention to use e-health</b>                                                     |          |          |          |          |          |          |          |
|                                                                                      | <b>1</b> | <b>2</b> | <b>3</b> | <b>4</b> | <b>5</b> | <b>6</b> | <b>7</b> |
| Using e-health system is usually frustrating                                         |          |          |          |          |          |          |          |
| The e-health system is rigid and inflexible to use                                   |          |          |          |          |          |          |          |
| I find it cumbersome to use the e-health system                                      |          |          |          |          |          |          |          |
| I find the e-health system useful in my job                                          |          |          |          |          |          |          |          |
| I find the e-health system easy to use                                               |          |          |          |          |          |          |          |
| <b>Staff IT experience</b>                                                           |          |          |          |          |          |          |          |
|                                                                                      | <b>1</b> | <b>2</b> | <b>3</b> | <b>4</b> | <b>5</b> | <b>6</b> | <b>7</b> |
| I have sufficient knowledge of the e-health system                                   |          |          |          |          |          |          |          |
| I am aware of the potential benefits of the e-health system                          |          |          |          |          |          |          |          |
| The hospital have IT experts to train staff in using the e-health system             |          |          |          |          |          |          |          |
| <b>Information sharing</b>                                                           |          |          |          |          |          |          |          |
|                                                                                      | <b>1</b> | <b>2</b> | <b>3</b> | <b>4</b> | <b>5</b> | <b>6</b> | <b>7</b> |
| The e-health system enhances information sharing within the hospital                 |          |          |          |          |          |          |          |
| The e-health system enhances information sharing with other hospitals                |          |          |          |          |          |          |          |
| The hospitals' policies and regulations do not affect the use of the e-health system |          |          |          |          |          |          |          |
| Overemphasis on protecting patients' privacy affects the use of the e-health system  |          |          |          |          |          |          |          |
| <b>Security concerns</b>                                                             |          |          |          |          |          |          |          |
|                                                                                      | <b>1</b> | <b>2</b> | <b>3</b> | <b>4</b> | <b>5</b> | <b>6</b> | <b>7</b> |
| There are security measures to protect information and preserve confidentiality      |          |          |          |          |          |          |          |
| There are security measures to communicate accurate information                      |          |          |          |          |          |          |          |
| There are security measures to protect medical records from unauthorized access      |          |          |          |          |          |          |          |
| Overemphasis on security affects the effective use of e-health system                |          |          |          |          |          |          |          |
| <b>Technical infrastructures</b>                                                     |          |          |          |          |          |          |          |
|                                                                                      | <b>1</b> | <b>2</b> | <b>3</b> | <b>4</b> | <b>5</b> | <b>6</b> | <b>7</b> |
| There are available computers to support the use of e-health system                  |          |          |          |          |          |          |          |
| The hospitals' IT budget is enough to sustain the e-health system                    |          |          |          |          |          |          |          |
| The hospitals' existing infrastructure is enough to support the e-health system      |          |          |          |          |          |          |          |
| There is a system in place to maintain the hospitals' existing infrastructure        |          |          |          |          |          |          |          |

#### **Demographic questions**

**Gender:** Male  Female

**Profession:** Doctor  Nurse  Other

**Experience:** 1-5  6-10  11-25

**IT knowledge:** None  Minimum  Fairly  Maximum

*Thank you for participating in this survey!*
